# Supplementary material for: Origin of the Felkin–Anh(–Eisenstein) model: a quantitative rationalization of a seminal concept
Source: Royal Society of Chemistry journal article supplement (doi:10.1039/d4sc03176h), 2024-01-01
Supplement: d4sc03176h1.pdf [file d4sc03176h1.pdf]

## Origin of the Felkin-Anh(-Eisenstein) Model: a Quantitative Rationalization of a Seminal Concept

Daniel González-Pinaro,<sup>[a]</sup> F. Matthias Bickelhaupt,<sup>[b]</sup> and Israel Fernández\*<sup>[a]</sup>

<sup>[a]</sup> Departamento de Química Orgánica I and Centro de Innovación en Química Avanzada (ORFEO-CINQA), Facultad de Ciencias Químicas, Universidad Complutense de Madrid, 28040-Madrid, Spain

e-mail: [israel@quim.ucm.es](mailto:israel@quim.ucm.es)

<sup>[b]</sup> Prof. Dr. F. M. Bickelhaupt

Department of Chemistry and Pharmaceutical Sciences, AIMMS, Vrije Universiteit, Amsterdam, 1081 HZ Amsterdam, The Netherlands

Institute for Molecules and Materials (IMM), Radboud University, Nijmegen 6500 GL, The Netherlands

Department of Chemical Sciences, University of Johannesburg, Johannesburg 2006, South Africa

### Contents:

1. Figures S1-4.....S1-S4
2. Cartesian coordinates and energies.....S5

## 1. Figures S1-S4

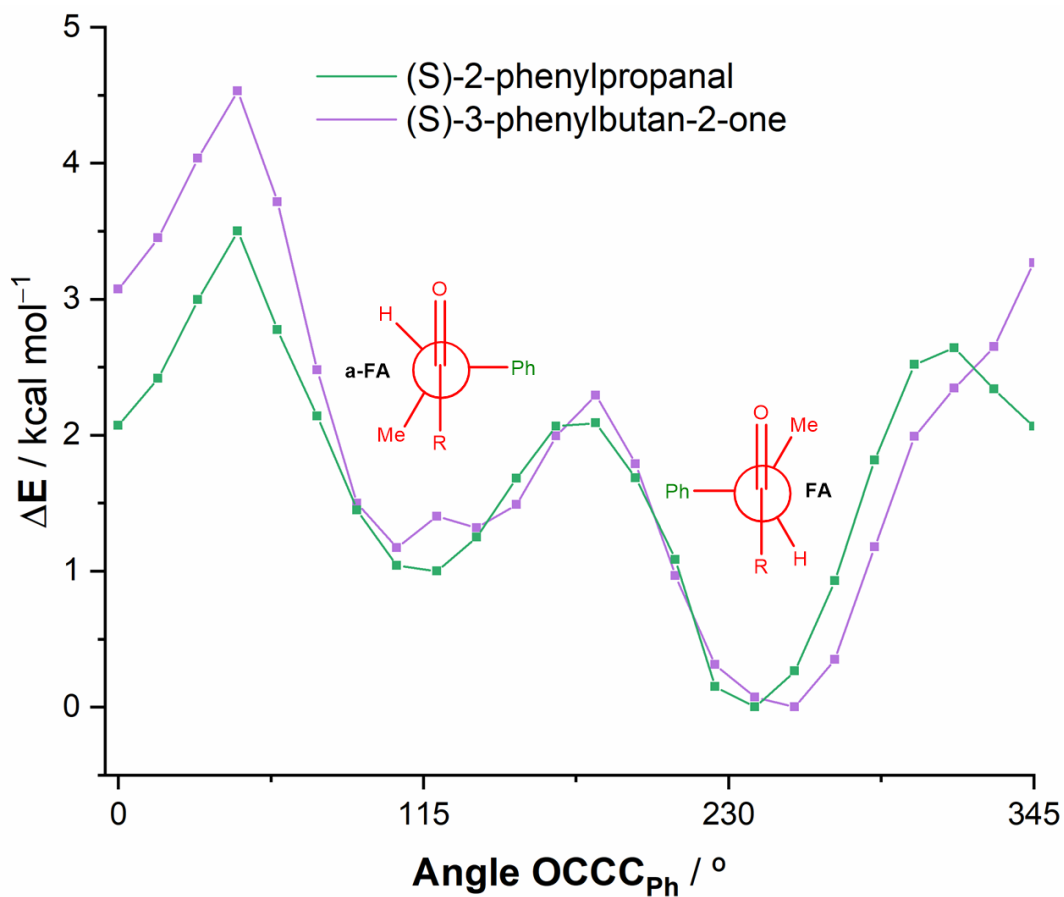

**Figure S1.** Conformational studies of (S)-2-phenylpropanal and (S)-3-phenylbutan-2-one. Zero energy equals the most stable conformation of each compound. All data were calculated at the M062X-6-311+G\* level.

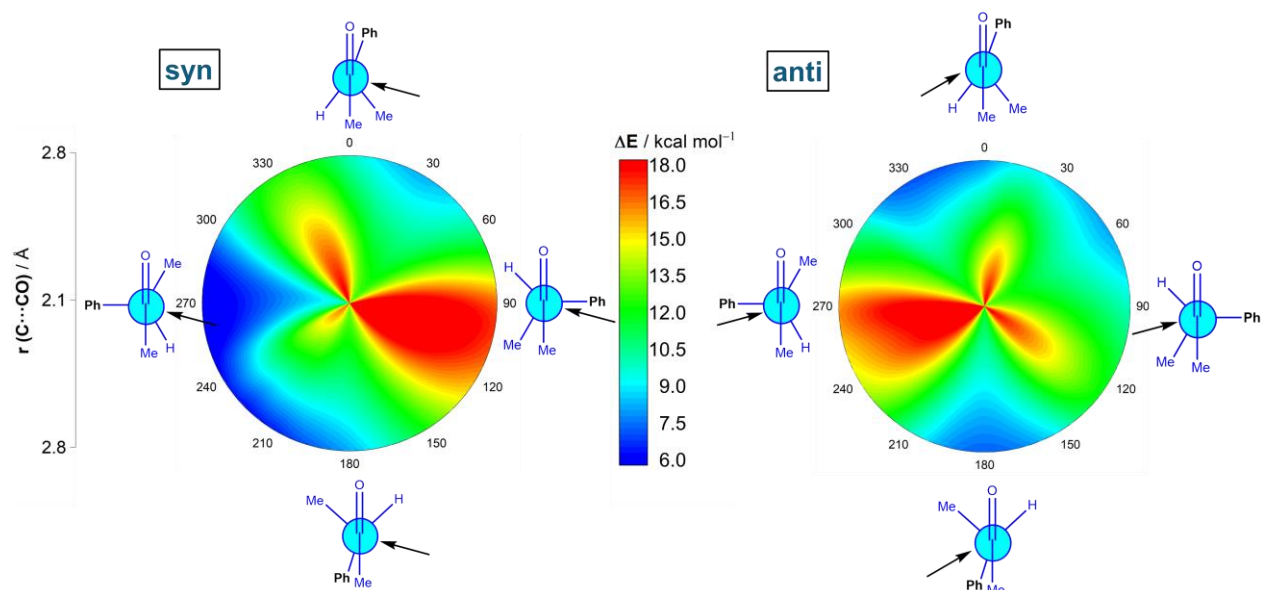

**Figure S2.** Possible cyanide additions to (S)-3-phenylbutan-2-one leading to the corresponding syn (left) and anti (right) reaction products. All data were calculated at the ZORA-M06-2X/TZ2P//M062X-6-311+G\* level and referenced to the Van der Waals complex between cyanide and (S)-3-phenylbutan-2-one. Energy values refer to electronic energies.

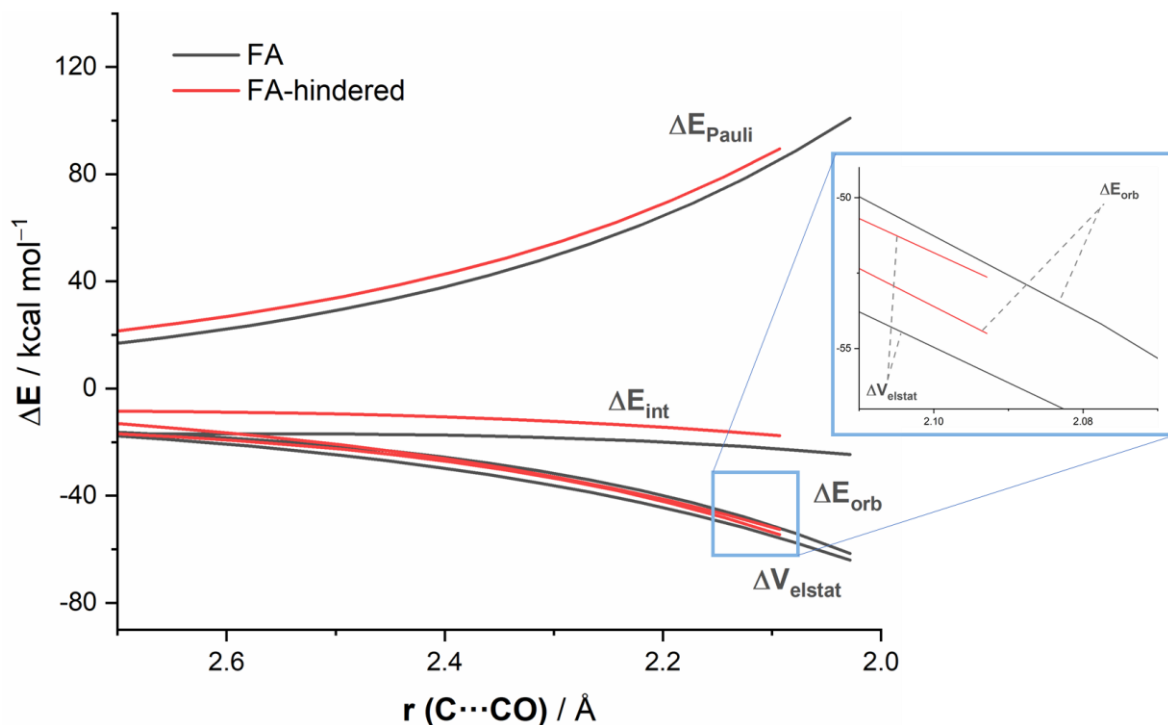

**Figure S3.** Comparative energy decomposition analyses of the addition of cyanide to (S)-3-phenylbutan-2-one following the **FA** (black) and **FA-hindered** (red) approaches projected onto the C...C(=O) bond-forming distance. All data were computed at the ZORA-M06-2X/TZ2P//M062X-6-311+G\* level.

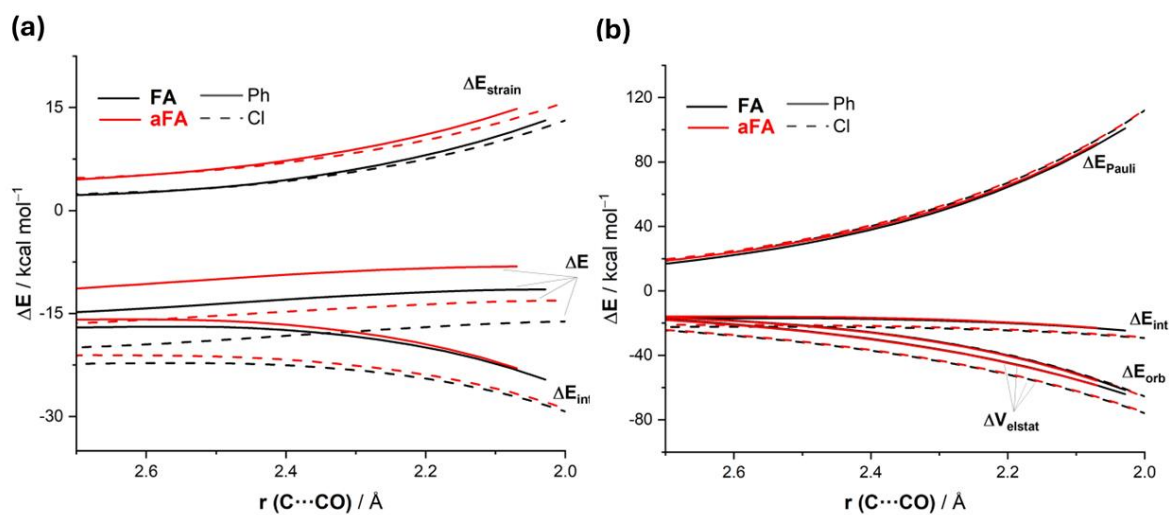

**Figure S4.** Comparative activation strain (a) and energy decomposition (b) analyses of the addition of cyanide to (S)-3-phenylbutan-2-one (solid lines) or the analogous system where the phenyl group was replaced by a chlorine atom (dotted lines) following the **FA** (black) and **anti-FA** (red) approaches projected onto the C...C(=O) bond-forming distance. All data were computed at the ZORA-M06-2X/TZ2P//M062X-6-311+G\* level.

## 2. Cartesian coordinates of the DFT-optimized structures

Cartesian coordinates (in Å) and total energies (in a.u., uncorrected ZVPE included) of all the stationary points discussed in the text. All calculations have been performed at the M062X-6-311+G\* level.

**SP** denotes values computed at the DLPNO-CCSD(T)/def2-TZVPP//M06-2X/6-311+G\*.

### (S)-2-phenylpropanal

**E** = -423.942613

**H** = -423.932497

**G** = -423.977653

**N<sub>imag</sub>** = 0

**SP** = -423.446688

|   |              |              |              |
|---|--------------|--------------|--------------|
| C | -1.300683000 | -0.705809000 | -0.056153000 |
| C | -2.053541000 | 0.284221000  | -0.926760000 |
| H | -1.682095000 | 0.369528000  | -1.967746000 |
| C | 0.164482000  | -0.310977000 | -0.042859000 |
| C | 0.533686000  | 0.974305000  | 0.361701000  |
| C | 1.161584000  | -1.210103000 | -0.416950000 |
| C | 1.871678000  | 1.348731000  | 0.396739000  |
| H | -0.233566000 | 1.687824000  | 0.649802000  |
| C | 2.502649000  | -0.839290000 | -0.379602000 |
| H | 0.887231000  | -2.211091000 | -0.735657000 |
| C | 2.860460000  | 0.441084000  | 0.027471000  |
| H | 2.143000000  | 2.350459000  | 0.710505000  |
| H | 3.266953000  | -1.551415000 | -0.670095000 |
| H | 3.904371000  | 0.732046000  | 0.055075000  |
| O | -2.971811000 | 0.959219000  | -0.550371000 |
| C | -1.902230000 | -0.801331000 | 1.343263000  |
| H | -2.953632000 | -1.088146000 | 1.295433000  |
| H | -1.358552000 | -1.535820000 | 1.939008000  |
| H | -1.848058000 | 0.162611000  | 1.851723000  |
| H | -1.379668000 | -1.674733000 | -0.566174000 |

### TS-FA // (S)-2-phenylpropanal

**E** = -516.803348

**H** = -516.791060

**G** = -516.841868

**N<sub>imag</sub>** = 1, -162.5544 cm<sup>-1</sup>

**SP** = -516.163132

|   |              |              |              |
|---|--------------|--------------|--------------|
| C | -0.754370000 | -0.380372000 | 0.321025000  |
| C | -1.503086000 | 0.548915000  | -0.663095000 |
| H | -1.442074000 | 0.185529000  | -1.705006000 |
| C | 0.738676000  | -0.248051000 | 0.097775000  |
| C | 1.369516000  | 1.001752000  | 0.143436000  |
| C | 1.528983000  | -1.373720000 | -0.143738000 |
| C | 2.743076000  | 1.112586000  | -0.038689000 |
| H | 0.757286000  | 1.883383000  | 0.299917000  |
| C | 2.906363000  | -1.266835000 | -0.324880000 |
| H | 1.054014000  | -2.349550000 | -0.189619000 |
| C | 3.520553000  | -0.020748000 | -0.271135000 |
| H | 3.211262000  | 2.091506000  | -0.005672000 |
| H | 3.497528000  | -2.158210000 | -0.511039000 |
| H | 4.592717000  | 0.068944000  | -0.413608000 |
| O | -1.565382000 | 1.760673000  | -0.434122000 |
| C | -3.349383000 | -0.403236000 | -0.467095000 |
| N | -4.411387000 | -0.876203000 | -0.420274000 |

|   |              |              |             |
|---|--------------|--------------|-------------|
| C | -1.125004000 | -0.039994000 | 1.763036000 |
| H | -2.197876000 | -0.187912000 | 1.902409000 |
| H | -0.574977000 | -0.666237000 | 2.471327000 |
| H | -0.898145000 | 1.007849000  | 1.969181000 |
| H | -1.048901000 | -1.409046000 | 0.097177000 |

**TS-FA-hindered //(S)-2-phenylpropanal**

**E** = -516.788952

**H** = -516.777433

**G** = -516.826448

**N<sub>imag</sub>** = 2, -137.972 and -67.549 cm<sup>-1</sup>

**SP** = -516.149458

|   |              |              |              |
|---|--------------|--------------|--------------|
| C | -0.999887000 | 1.705491000  | 0.873356000  |
| N | -0.620871000 | 2.580932000  | 1.542584000  |
| C | -1.137386000 | -0.990210000 | -0.346740000 |
| C | -2.196206000 | 0.147500000  | -0.180208000 |
| C | -1.528235000 | -2.108503000 | 0.618508000  |
| H | -2.563236000 | -2.412483000 | 0.442016000  |
| H | -0.889666000 | -2.988589000 | 0.505493000  |
| H | -1.459569000 | -1.765085000 | 1.655079000  |
| H | -1.305629000 | -1.333723000 | -1.372448000 |
| O | -2.783376000 | 0.568670000  | -1.167936000 |
| H | -2.709504000 | 0.112815000  | 0.794650000  |
| C | 0.316339000  | -0.587732000 | -0.248743000 |
| C | 1.178243000  | -1.036250000 | 0.747486000  |
| C | 0.829706000  | 0.268113000  | -1.230357000 |
| C | 2.513513000  | -0.633704000 | 0.773356000  |
| C | 2.155430000  | 0.668709000  | -1.210512000 |
| C | 3.009529000  | 0.216763000  | -0.204193000 |
| H | 0.811469000  | -1.686850000 | 1.533365000  |
| H | 0.151037000  | 0.649919000  | -1.987462000 |
| H | 3.162253000  | -0.981649000 | 1.571295000  |
| H | 2.523889000  | 1.350892000  | -1.969911000 |
| H | 4.045785000  | 0.537796000  | -0.178398000 |

**TS-CF //(S)-2-phenylpropanal**

**E** = -516.799510

**H** = -516.787215

**G** = -516.838131

**N<sub>imag</sub>** = 1, -152.7251 cm<sup>-1</sup>

**SP** = -516.159097

|   |              |              |              |
|---|--------------|--------------|--------------|
| C | 1.562618000  | 1.853539000  | -0.349687000 |
| N | 1.541846000  | 2.997617000  | -0.134893000 |
| C | 0.985713000  | -0.668103000 | 0.581426000  |
| C | 1.919834000  | -0.241161000 | -0.586335000 |
| O | 3.117587000  | -0.501838000 | -0.523059000 |
| C | 1.238476000  | -2.157244000 | 0.849057000  |
| H | 2.286530000  | -2.296549000 | 1.115315000  |
| H | 0.602826000  | -2.526160000 | 1.659011000  |
| H | 1.048040000  | -2.768494000 | -0.037847000 |
| H | 1.302956000  | -0.102825000 | 1.459872000  |
| H | 1.400426000  | -0.205728000 | -1.562745000 |
| C | -0.461802000 | -0.364033000 | 0.292762000  |
| C | -1.092377000 | 0.737671000  | 0.877456000  |
| C | -1.203878000 | -1.145434000 | -0.597417000 |
| C | -2.421809000 | 1.034981000  | 0.601953000  |
| C | -2.534896000 | -0.849963000 | -0.881528000 |
| C | -3.152411000 | 0.239429000  | -0.276938000 |
| H | -0.513176000 | 1.386063000  | 1.525461000  |

|   |              |              |              |
|---|--------------|--------------|--------------|
| H | -0.737369000 | -1.997874000 | -1.080604000 |
| H | -2.883658000 | 1.902519000  | 1.061956000  |
| H | -3.087897000 | -1.471323000 | -1.579253000 |
| H | -4.189096000 | 0.473656000  | -0.496937000 |

**TS-anti-FA // (S)-2-phenylpropanal**

**E** = -516.799703

**H** = -516.787470

**G** = -516.838360

**N<sub>imag</sub>** = 1, -142.4612 cm<sup>-1</sup>

**SP** = -516.158765

|   |              |              |              |
|---|--------------|--------------|--------------|
| C | -0.758082000 | 0.329059000  | 0.439497000  |
| C | -1.431864000 | -0.572316000 | -0.639117000 |
| C | 0.740968000  | 0.187956000  | 0.252501000  |
| C | 1.527071000  | 1.182006000  | -0.333393000 |
| C | 1.371847000  | -1.002198000 | 0.638049000  |
| C | 2.898456000  | 1.004764000  | -0.515835000 |
| H | 1.069262000  | 2.111851000  | -0.652278000 |
| C | 2.736992000  | -1.181295000 | 0.461979000  |
| H | 0.761702000  | -1.796477000 | 1.052946000  |
| C | 3.511495000  | -0.175236000 | -0.114791000 |
| H | 3.485905000  | 1.795101000  | -0.973068000 |
| H | 3.200766000  | -2.113558000 | 0.768796000  |
| H | 4.578963000  | -0.314374000 | -0.252719000 |
| C | -3.445261000 | -0.139266000 | -0.084951000 |
| N | -4.572730000 | -0.021270000 | 0.179673000  |
| C | -1.237680000 | 1.774616000  | 0.393282000  |
| H | -2.260307000 | 1.843617000  | 0.757502000  |
| H | -0.598344000 | 2.425545000  | 0.997075000  |
| H | -1.235091000 | 2.156926000  | -0.633541000 |
| H | -1.020277000 | -0.120208000 | 1.400879000  |
| H | -1.598705000 | -0.026070000 | -1.587855000 |
| O | -1.232301000 | -1.782751000 | -0.639847000 |

**TS-anti-CF // (S)-2-phenylpropanal**

**E** = -516.801917

**H** = -516.789721

**G** = -516.840054

**N<sub>imag</sub>** = 1, -151.3204 cm<sup>-1</sup>

**SP** = -516.161519

|   |              |              |              |
|---|--------------|--------------|--------------|
| C | -1.692778000 | 1.429423000  | -0.677331000 |
| N | -1.826096000 | 2.585439000  | -0.657355000 |
| C | -0.874172000 | -0.941834000 | 0.491990000  |
| C | -1.790349000 | -0.688700000 | -0.737612000 |
| C | -1.534768000 | -0.454284000 | 1.774830000  |
| H | -2.527672000 | -0.900263000 | 1.850185000  |
| H | -0.948068000 | -0.729463000 | 2.656589000  |
| H | -1.665372000 | 0.629094000  | 1.752527000  |
| H | -0.839578000 | -2.040428000 | 0.530584000  |
| O | -2.954800000 | -1.081089000 | -0.703886000 |
| H | -1.227266000 | -0.670629000 | -1.689193000 |
| C | 0.541145000  | -0.473208000 | 0.270363000  |
| C | 1.436420000  | -1.300223000 | -0.414409000 |
| C | 0.999062000  | 0.779553000  | 0.688725000  |
| C | 2.745783000  | -0.903185000 | -0.669973000 |
| C | 2.307282000  | 1.180536000  | 0.440181000  |
| C | 3.188627000  | 0.342368000  | -0.237680000 |
| H | 1.095473000  | -2.275623000 | -0.751792000 |

|   |             |              |              |
|---|-------------|--------------|--------------|
| H | 0.315210000 | 1.458466000  | 1.182653000  |
| H | 3.418081000 | -1.566593000 | -1.205258000 |
| H | 2.635071000 | 2.162740000  | 0.764988000  |
| H | 4.207677000 | 0.660671000  | -0.433219000 |

**(S)-3-phenylbutan-2-one**

**E** = -463.227970

**H** = -463.216274

**G** = -463.265277

**N<sub>imag</sub>** = 0

**SP** = -462.69822

|   |              |              |              |
|---|--------------|--------------|--------------|
| C | 1.086823000  | -0.453075000 | 0.706397000  |
| C | 1.977611000  | 0.440988000  | -0.159489000 |
| O | 2.648215000  | -0.012065000 | -1.052889000 |
| C | 1.474241000  | -1.924292000 | 0.577827000  |
| H | 2.512113000  | -2.081301000 | 0.876591000  |
| H | 0.827212000  | -2.540683000 | 1.203973000  |
| H | 1.376297000  | -2.257165000 | -0.455919000 |
| H | 1.206561000  | -0.124194000 | 1.745170000  |
| C | 1.949874000  | 1.917763000  | 0.159112000  |
| H | 0.922114000  | 2.267984000  | 0.278170000  |
| H | 2.464811000  | 2.088913000  | 1.109251000  |
| H | 2.452714000  | 2.480082000  | -0.625165000 |
| C | -0.360055000 | -0.209623000 | 0.310927000  |
| C | -0.758780000 | -0.383387000 | -1.016600000 |
| C | -1.311154000 | 0.178196000  | 1.253307000  |
| C | -2.081401000 | -0.176166000 | -1.390255000 |
| C | -2.637141000 | 0.383474000  | 0.882218000  |
| C | -3.025251000 | 0.206836000  | -0.441032000 |
| H | -0.024855000 | -0.676108000 | -1.762040000 |
| H | -1.012649000 | 0.317646000  | 2.288038000  |
| H | -2.376040000 | -0.312147000 | -2.424859000 |
| H | -3.365668000 | 0.681565000  | 1.628038000  |
| H | -4.056931000 | 0.367653000  | -0.732604000 |

**TS-FA // (S)-3-phenylbutan-2-one**

**E** = -556.085378

**H** = -556.071768

**G** = -556.124997

**N<sub>imag</sub>** = 1, -191.0575 cm<sup>-1</sup>

**SP** = -555.411434

|   |              |              |              |
|---|--------------|--------------|--------------|
| C | -3.212569000 | -0.394935000 | -0.147577000 |
| N | -4.280201000 | -0.833452000 | -0.007365000 |
| C | -0.618547000 | -0.449601000 | 0.510896000  |
| C | -1.424791000 | 0.531826000  | -0.393352000 |
| O | -1.482821000 | 1.722556000  | -0.043045000 |
| C | -0.940878000 | -0.196882000 | 1.981214000  |
| H | -2.004472000 | -0.373271000 | 2.154701000  |
| H | -0.352873000 | -0.850217000 | 2.632537000  |
| H | -0.726910000 | 0.843132000  | 2.234383000  |
| H | -0.901380000 | -1.471928000 | 0.245086000  |
| C | -1.291668000 | 0.221464000  | -1.885606000 |
| H | -0.307320000 | 0.572037000  | -2.217380000 |
| H | -1.386695000 | -0.846008000 | -2.096929000 |
| H | -2.060064000 | 0.767932000  | -2.431467000 |
| C | 0.862634000  | -0.279845000 | 0.243114000  |
| C | 1.482863000  | 0.968186000  | 0.384433000  |
| C | 1.650488000  | -1.363340000 | -0.150104000 |
| C | 2.843873000  | 1.117525000  | 0.144591000  |



|   |             |              |              |
|---|-------------|--------------|--------------|
| C | 3.015749000 | -1.218507000 | -0.387907000 |
| C | 3.619705000 | 0.024982000  | -0.239650000 |
| H | 0.869161000 | 1.820749000  | 0.654869000  |
| H | 1.182403000 | -2.335845000 | -0.274057000 |
| H | 3.303485000 | 2.095202000  | 0.252221000  |
| H | 3.605255000 | -2.077847000 | -0.692514000 |
| H | 4.682230000 | 0.144553000  | -0.425848000 |

**TS-FA-hindered //(S)-3-phenylbutan-2-one**

**E** = -556.066309

**H** = -556.053753

**G** = -556.104267

**N<sub>imag</sub>** = 2, -180.1281 and -67.2927 cm<sup>-1</sup>

**SP** = -555.393133

|   |              |              |              |
|---|--------------|--------------|--------------|
| C | -0.816509000 | -1.642205000 | -0.684454000 |
| N | -0.438110000 | -2.588759000 | -1.245540000 |
| C | -0.830346000 | 0.956958000  | 0.554176000  |
| C | -1.911735000 | -0.185170000 | 0.344033000  |
| C | -1.232755000 | 2.261076000  | -0.138552000 |
| H | -2.233179000 | 2.566642000  | 0.175422000  |
| H | -0.538296000 | 3.065480000  | 0.121337000  |
| H | -1.246061000 | 2.168791000  | -1.226897000 |
| H | -0.914621000 | 1.125379000  | 1.631838000  |
| O | -2.378297000 | -0.666547000 | 1.383403000  |
| C | -2.862048000 | -0.004749000 | -0.846157000 |
| H | -2.342437000 | 0.236810000  | -1.774064000 |
| H | -3.404320000 | -0.939178000 | -0.979222000 |
| H | -3.583194000 | 0.786984000  | -0.608793000 |
| C | 0.608221000  | 0.569244000  | 0.304155000  |
| C | 1.379826000  | 1.090827000  | -0.731207000 |
| C | 1.203978000  | -0.358377000 | 1.167230000  |
| C | 2.704711000  | 0.692621000  | -0.909795000 |
| C | 2.520003000  | -0.755582000 | 0.995703000  |
| C | 3.281701000  | -0.229386000 | -0.047799000 |
| H | 0.947761000  | 1.803985000  | -1.424703000 |
| H | 0.593970000  | -0.795737000 | 1.952094000  |
| H | 3.281637000  | 1.102003000  | -1.733488000 |
| H | 2.951946000  | -1.492590000 | 1.665010000  |
| H | 4.309654000  | -0.546428000 | -0.190977000 |

**TS-CF //(S)-3-phenylbutan-2-one**

**E** = -556.079595

**H** = -556.066118

**G** = -556.118853

**N<sub>imag</sub>** = 1, -190.1446 cm<sup>-1</sup>

**SP** = -555.405674

|   |              |              |              |
|---|--------------|--------------|--------------|
| C | -1.592569000 | 1.811981000  | 0.094286000  |
| N | -1.639437000 | 2.959043000  | -0.094098000 |
| C | -0.769543000 | -0.648919000 | -0.788129000 |
| C | -1.859691000 | -0.228719000 | 0.262714000  |
| O | -3.026816000 | -0.511433000 | -0.034394000 |
| C | -0.977090000 | -2.142788000 | -1.068974000 |
| H | -1.978126000 | -2.288955000 | -1.472859000 |
| H | -0.235309000 | -2.519228000 | -1.779649000 |
| H | -0.909191000 | -2.744279000 | -0.157565000 |
| H | -1.027170000 | -0.096357000 | -1.694336000 |
| C | -1.436234000 | -0.331265000 | 1.728668000  |
| H | -1.335313000 | -1.393399000 | 1.988748000  |
| H | -0.497444000 | 0.180770000  | 1.937642000  |

|   |              |              |              |
|---|--------------|--------------|--------------|
| H | -2.231973000 | 0.096313000  | 2.337898000  |
| C | 0.656115000  | -0.316517000 | -0.414518000 |
| C | 1.215730000  | 0.912319000  | -0.780130000 |
| C | 1.456964000  | -1.203105000 | 0.313495000  |
| C | 2.519263000  | 1.244252000  | -0.426329000 |
| C | 2.761392000  | -0.875706000 | 0.671714000  |
| C | 3.300949000  | 0.352346000  | 0.302289000  |
| H | 0.603538000  | 1.624793000  | -1.320752000 |
| H | 1.054842000  | -2.164306000 | 0.615798000  |
| H | 2.921271000  | 2.210222000  | -0.714509000 |
| H | 3.356458000  | -1.582650000 | 1.241863000  |
| H | 4.317277000  | 0.611961000  | 0.581034000  |

**TS-anti-FA // (S)-3-phenylbutan-2-one**

**E** = -556.079894

**H** = -556.066382

**G** = -556.119638

**N<sub>imag</sub>** = 1, -179.3023 cm<sup>-1</sup>

**SP** = -555.405817

|   |              |              |              |
|---|--------------|--------------|--------------|
| C | -3.274167000 | -0.129532000 | 0.251827000  |
| N | -4.375798000 | -0.025081000 | 0.610660000  |
| C | -0.599289000 | 0.356243000  | 0.620988000  |
| C | -1.357585000 | -0.583916000 | -0.383027000 |
| C | -1.041962000 | 1.815718000  | 0.635896000  |
| H | -2.091585000 | 1.883378000  | 0.917630000  |
| H | -0.446327000 | 2.391468000  | 1.351722000  |
| H | -0.932485000 | 2.291782000  | -0.341898000 |
| H | -0.812906000 | -0.085442000 | 1.598213000  |
| O | -1.165159000 | -1.799401000 | -0.254774000 |
| C | -1.513413000 | -0.021494000 | -1.795816000 |
| H | -0.518476000 | 0.007784000  | -2.258154000 |
| H | -2.141776000 | -0.705945000 | -2.364812000 |
| H | -1.957359000 | 0.973541000  | -1.818444000 |
| C | 0.890313000  | 0.191466000  | 0.365690000  |
| C | 1.512640000  | -1.022892000 | 0.687513000  |
| C | 1.679020000  | 1.193908000  | -0.203386000 |
| C | 2.867231000  | -1.220038000 | 0.455653000  |
| C | 3.039787000  | 0.999005000  | -0.440017000 |
| C | 3.642167000  | -0.207948000 | -0.109552000 |
| H | 0.900181000  | -1.818964000 | 1.094252000  |
| H | 1.233518000  | 2.146281000  | -0.467338000 |
| H | 3.322314000  | -2.171714000 | 0.711971000  |
| H | 3.627064000  | 1.797255000  | -0.883678000 |
| H | 4.701232000  | -0.361776000 | -0.290507000 |

**TS-anti-CF // (S)-3-phenylbutan-2-one**

**E** = -556.082586

**H** = -556.069075

**G** = -556.121715

**N<sub>imag</sub>** = 1, -195.2478 cm<sup>-1</sup>

**SP** = -555.408265

|   |             |              |              |
|---|-------------|--------------|--------------|
| C | 1.746224000 | 1.389529000  | 0.588402000  |
| N | 1.924127000 | 2.532006000  | 0.713807000  |
| C | 0.701643000 | -0.726444000 | -0.820240000 |
| C | 1.777236000 | -0.643399000 | 0.316875000  |
| C | 1.211961000 | -0.039818000 | -2.083156000 |
| H | 2.203828000 | -0.427061000 | -2.318104000 |
| H | 0.540497000 | -0.217031000 | -2.928739000 |
| H | 1.307951000 | 1.036272000  | -1.925401000 |

|   |              |              |              |
|---|--------------|--------------|--------------|
| H | 0.675860000  | -1.807958000 | -1.017314000 |
| O | 2.921353000  | -1.001107000 | 0.004035000  |
| C | 1.261990000  | -1.001521000 | 1.711351000  |
| H | 1.043893000  | -2.077506000 | 1.727871000  |
| H | 2.056509000  | -0.799268000 | 2.429089000  |
| H | 0.364601000  | -0.449311000 | 1.990456000  |
| C | -0.702112000 | -0.326240000 | -0.433781000 |
| C | -1.622270000 | -1.305799000 | -0.045633000 |
| C | -1.132653000 | 1.005224000  | -0.435223000 |
| C | -2.919386000 | -0.979756000 | 0.337544000  |
| C | -2.428305000 | 1.337303000  | -0.051587000 |
| C | -3.329528000 | 0.349785000  | 0.336711000  |
| H | -1.306708000 | -2.345697000 | -0.035738000 |
| H | -0.436873000 | 1.789652000  | -0.705368000 |
| H | -3.608217000 | -1.763618000 | 0.637357000  |
| H | -2.731259000 | 2.379493000  | -0.047583000 |
| H | -4.338605000 | 0.613675000  | 0.636964000  |

### 3-chlorobutan-2-one

**E** = -691.912303

**H** = -691.904136

**G** = -691.944178

**N<sub>imag</sub>** = 0

**SP** = -691.207293

|    |              |              |              |
|----|--------------|--------------|--------------|
| C  | 0.359627000  | 0.382830000  | 0.479939000  |
| C  | -1.074736000 | 0.090618000  | 0.022238000  |
| Cl | 1.456140000  | -0.878550000 | -0.211906000 |
| O  | -1.744981000 | 0.974691000  | -0.441878000 |
| C  | 0.834075000  | 1.766972000  | 0.101256000  |
| H  | 0.172765000  | 2.511736000  | 0.546309000  |
| H  | 1.850607000  | 1.931298000  | 0.457666000  |
| H  | 0.808429000  | 1.897882000  | -0.980537000 |
| H  | 0.405192000  | 0.225902000  | 1.560570000  |
| C  | -1.597210000 | -1.312986000 | 0.205607000  |
| H  | -1.292096000 | -1.921960000 | -0.648621000 |
| H  | -1.185577000 | -1.784938000 | 1.099195000  |
| H  | -2.684379000 | -1.286699000 | 0.248610000  |

### TS-FA // Large group = Cl

**E** = -784.777857

**H** = -784.767791

**G** = -784.812231

**N<sub>imag</sub>** = 1, 203.4835 cm<sup>-1</sup>

**SP** = -783.927689

|    |              |              |              |
|----|--------------|--------------|--------------|
| C  | 0.473663000  | -0.509551000 | -0.346375000 |
| C  | -0.430112000 | 0.510246000  | 0.403133000  |
| Cl | 2.199189000  | 0.143146000  | -0.355589000 |
| O  | -0.421282000 | 0.477641000  | 1.646619000  |
| C  | -2.069420000 | -0.231893000 | -0.330458000 |
| N  | -3.113814000 | -0.635994000 | -0.636848000 |
| C  | 0.483949000  | -1.862093000 | 0.324073000  |
| H  | -0.529734000 | -2.268756000 | 0.296655000  |
| H  | 1.166536000  | -2.550585000 | -0.177643000 |
| H  | 0.775598000  | -1.740901000 | 1.367461000  |
| H  | 0.211278000  | -0.562431000 | -1.401049000 |
| C  | -0.505443000 | 1.874370000  | -0.290094000 |
| H  | 0.401964000  | 2.431358000  | -0.040371000 |
| H  | -0.592490000 | 1.788224000  | -1.376148000 |
| H  | -1.368234000 | 2.413956000  | 0.099414000  |

**TS-anti-FA // Large group = Cl****E** = -784.773221**H** = -784.763107**G** = -784.807807**N<sub>imag</sub>** = 1, -185.2890 cm<sup>-1</sup>**SP** = -783.922790

|    |              |              |              |
|----|--------------|--------------|--------------|
| C  | -0.490508000 | 0.523458000  | -0.369373000 |
| C  | 0.389271000  | -0.711489000 | -0.016312000 |
| Cl | -2.245514000 | -0.013545000 | -0.239013000 |
| C  | 2.102400000  | 0.256085000  | -0.281911000 |
| N  | 3.167721000  | 0.663593000  | -0.502499000 |
| C  | -0.351088000 | 1.781156000  | 0.467604000  |
| H  | 0.684677000  | 2.122210000  | 0.452028000  |
| H  | -0.992011000 | 2.572446000  | 0.072911000  |
| H  | -0.648055000 | 1.592744000  | 1.501124000  |
| H  | -0.351314000 | 0.715251000  | -1.431128000 |
| O  | 0.316444000  | -1.682464000 | -0.781888000 |
| C  | 0.532182000  | -0.976009000 | 1.485301000  |
| H  | -0.430279000 | -1.344681000 | 1.856880000  |
| H  | 1.279802000  | -1.757455000 | 1.617527000  |
| H  | 0.831779000  | -0.094894000 | 2.054620000  |

**TS-FA //(S)-2-phenylpropanal //Nu = Me<sub>2</sub>S=CH-CN****E** = -1033.276885**H** = -1033.259092**G** = -1033.322136**N<sub>imag</sub>** = 1, -227.7959 cm<sup>-1</sup>**SP** = -1032.108243

|   |              |              |              |
|---|--------------|--------------|--------------|
| C | -0.854302000 | 0.316302000  | 0.934570000  |
| C | 0.188995000  | -0.342353000 | 0.008664000  |
| H | 0.155607000  | 0.140274000  | -0.993473000 |
| C | -2.219902000 | 0.182263000  | 0.288324000  |
| C | -2.723486000 | -1.075272000 | -0.059747000 |
| C | -3.002844000 | 1.308943000  | 0.038004000  |
| C | -3.982426000 | -1.195703000 | -0.636647000 |
| H | -2.108799000 | -1.953095000 | 0.108516000  |
| C | -4.265235000 | 1.189728000  | -0.537416000 |
| H | -2.620996000 | 2.292025000  | 0.297359000  |
| C | -4.759295000 | -0.064660000 | -0.875532000 |
| H | -4.358680000 | -2.177262000 | -0.904252000 |
| H | -4.859880000 | 2.077748000  | -0.722519000 |
| H | -5.741522000 | -0.161595000 | -1.324772000 |
| O | 0.373611000  | -1.594023000 | 0.067667000  |
| C | -0.842939000 | -0.320043000 | 2.324087000  |
| H | 0.117202000  | -0.180655000 | 2.829046000  |
| H | -1.622310000 | 0.115039000  | 2.952359000  |
| H | -1.015026000 | -1.393511000 | 2.242263000  |
| H | -0.628326000 | 1.386838000  | 1.007764000  |
| C | 1.806581000  | 0.496180000  | 0.558029000  |
| H | 1.803479000  | 0.550309000  | 1.643854000  |
| C | 2.080850000  | 1.734956000  | -0.094954000 |
| N | 2.268217000  | 2.690909000  | -0.715916000 |
| S | 2.970866000  | -0.784023000 | 0.086903000  |
| C | 2.669638000  | -0.948220000 | -1.686581000 |
| H | 1.721527000  | -1.476156000 | -1.768015000 |
| H | 2.637619000  | 0.041863000  | -2.141736000 |
| H | 3.486733000  | -1.539415000 | -2.097161000 |
| C | 4.569376000  | 0.064353000  | 0.041871000  |
| H | 5.307328000  | -0.631569000 | -0.355714000 |
| H | 4.505367000  | 0.960509000  | -0.574726000 |
| H | 4.830362000  | 0.329996000  | 1.064799000  |

**TS-anti-FA // (S)-2-phenylpropanal //Nu = Me<sub>2</sub>S=CH-CN****E** = -1033.273027**H** = -1033.255344**G** = -1033.318009**N<sub>imag</sub>** = 1, -208.4082 cm<sup>-1</sup>**SP** = -1032.103346

|   |              |              |              |
|---|--------------|--------------|--------------|
| C | 0.816081000  | 0.821616000  | 0.306916000  |
| C | -0.095565000 | -0.130438000 | -0.501991000 |
| H | 0.009794000  | 0.087336000  | -1.590692000 |
| C | 2.230452000  | 0.289907000  | 0.163274000  |
| C | 3.150645000  | 0.850794000  | -0.722457000 |
| C | 2.617822000  | -0.832892000 | 0.900454000  |
| C | 4.429826000  | 0.314923000  | -0.859342000 |
| H | 2.879683000  | 1.718940000  | -1.313482000 |
| C | 3.892359000  | -1.367071000 | 0.769296000  |
| H | 1.896583000  | -1.295135000 | 1.564931000  |
| C | 4.806543000  | -0.793089000 | -0.111668000 |
| H | 5.131244000  | 0.769050000  | -1.551039000 |
| H | 4.174058000  | -2.236828000 | 1.352936000  |
| H | 5.802999000  | -1.208637000 | -0.213695000 |
| O | -0.202645000 | -1.340350000 | -0.154132000 |
| C | 0.672804000  | 2.279576000  | -0.126421000 |
| H | -0.249762000 | 2.724099000  | 0.250773000  |
| H | 1.497513000  | 2.885319000  | 0.253270000  |
| H | 0.670415000  | 2.372851000  | -1.217825000 |
| H | 0.522226000  | 0.717859000  | 1.357206000  |
| C | -1.807075000 | 0.684014000  | -0.363082000 |
| H | -1.913674000 | 1.424979000  | -1.154292000 |
| C | -2.177744000 | 1.187181000  | 0.924037000  |
| N | -2.446944000 | 1.532577000  | 1.992579000  |
| S | -2.832469000 | -0.727465000 | -0.807264000 |
| C | -2.882557000 | -1.715714000 | 0.705349000  |
| H | -1.851601000 | -2.019199000 | 0.879630000  |
| H | -3.275338000 | -1.106297000 | 1.518303000  |
| H | -3.527899000 | -2.567916000 | 0.497237000  |
| C | -4.516207000 | -0.060026000 | -0.770009000 |
| H | -5.212941000 | -0.890663000 | -0.881129000 |
| H | -4.683404000 | 0.461459000  | 0.172282000  |
| H | -4.624939000 | 0.624299000  | -1.609318000 |

**TS-FA-hindered // (S)-2-phenylpropanal //Nu = Me<sub>2</sub>S=CH-CN****E** = -1033.272223**H** = -1033.255468**G** = -1033.315043**N<sub>imag</sub>** = 2, -241.0888 cm<sup>-1</sup>, -44.4480cm<sup>-1</sup>**SP** = -1032.103390

|   |              |              |              |
|---|--------------|--------------|--------------|
| C | -1.008290000 | 1.806597000  | -0.124969000 |
| C | 0.527411000  | 1.531526000  | -0.293994000 |
| H | 1.057821000  | 1.825143000  | 0.641403000  |
| C | -1.881882000 | 0.575340000  | -0.160478000 |
| C | -2.273737000 | -0.108015000 | 0.992576000  |
| C | -2.253767000 | 0.047033000  | -1.401704000 |
| C | -2.997757000 | -1.294984000 | 0.906530000  |
| H | -2.002090000 | 0.272936000  | 1.970682000  |
| C | -2.978072000 | -1.136503000 | -1.491085000 |
| H | -1.953547000 | 0.570605000  | -2.304495000 |
| C | -3.350253000 | -1.816233000 | -0.333649000 |
| H | -3.285559000 | -1.812545000 | 1.815114000  |
| H | -3.256371000 | -1.526532000 | -2.464281000 |
| H | -3.916689000 | -2.738481000 | -0.398518000 |
| O | 1.075124000  | 1.804843000  | -1.392820000 |

|   |              |              |              |
|---|--------------|--------------|--------------|
| C | -1.214212000 | 2.659067000  | 1.127579000  |
| H | -0.658639000 | 3.595349000  | 1.040035000  |
| H | -2.269011000 | 2.898833000  | 1.277526000  |
| H | -0.849784000 | 2.149723000  | 2.023990000  |
| H | -1.242468000 | 2.405296000  | -1.008644000 |
| C | 0.793281000  | -0.362944000 | 0.047168000  |
| H | 0.041513000  | -0.933161000 | -0.492139000 |
| C | 0.898167000  | -0.661169000 | 1.437312000  |
| N | 1.053440000  | -0.793466000 | 2.575145000  |
| S | 2.350479000  | -0.581598000 | -0.806756000 |
| C | 3.437999000  | 0.613868000  | -0.000335000 |
| H | 3.134264000  | 1.586073000  | -0.383243000 |
| H | 3.323332000  | 0.537129000  | 1.081071000  |
| H | 4.456764000  | 0.374923000  | -0.301599000 |
| C | 3.029416000  | -2.111764000 | -0.118128000 |
| H | 4.033911000  | -2.246845000 | -0.517896000 |
| H | 3.044263000  | -2.058885000 | 0.970219000  |
| H | 2.389744000  | -2.929390000 | -0.445522000 |

**TS-FA //(S)-2-phenylpropanal //Nu = Me<sub>2</sub>S=CH-CO<sub>2</sub>Me**

**E** = -1168.851516

**H** = -1168.831167

**G** = -1168.899924

**N<sub>imag</sub>** = 1, -240.9145 cm<sup>-1</sup>

**SP** = -1167.562146

|   |              |              |              |
|---|--------------|--------------|--------------|
| C | -1.133820000 | -0.167192000 | 1.028193000  |
| C | -0.100485000 | -0.709088000 | 0.014341000  |
| H | -0.071703000 | -0.036191000 | -0.875037000 |
| C | -2.457765000 | 0.013546000  | 0.312465000  |
| C | -3.053896000 | -1.054062000 | -0.367112000 |
| C | -3.111439000 | 1.245857000  | 0.324335000  |
| C | -4.274650000 | -0.887500000 | -1.011008000 |
| H | -2.538236000 | -2.008021000 | -0.399561000 |
| C | -4.336041000 | 1.413631000  | -0.317516000 |
| H | -2.657363000 | 2.083123000  | 0.846541000  |
| C | -4.921953000 | 0.345717000  | -0.987302000 |
| H | -4.723478000 | -1.724062000 | -1.536022000 |
| H | -4.830436000 | 2.378946000  | -0.293420000 |
| H | -5.875382000 | 0.472186000  | -1.488510000 |
| O | -0.047997000 | -1.965511000 | -0.197000000 |
| C | -1.280832000 | -1.113803000 | 2.219340000  |
| H | -0.346706000 | -1.204918000 | 2.780512000  |
| H | -2.051460000 | -0.751611000 | 2.902604000  |
| H | -1.553702000 | -2.110827000 | 1.872935000  |
| H | -0.809027000 | 0.818409000  | 1.377774000  |
| C | 1.524419000  | -0.184591000 | 0.739460000  |
| H | 1.465099000  | -0.450095000 | 1.791339000  |
| S | 2.598614000  | -1.385625000 | -0.024256000 |
| C | 2.302120000  | -1.287680000 | -1.805594000 |
| H | 3.054240000  | -1.921473000 | -2.274428000 |
| H | 1.303578000  | -1.698798000 | -1.943517000 |
| H | 2.386699000  | -0.255832000 | -2.134143000 |
| C | 4.261362000  | -0.676634000 | 0.068944000  |
| H | 4.947782000  | -1.384491000 | -0.394895000 |
| H | 4.291328000  | 0.285273000  | -0.436361000 |
| H | 4.510968000  | -0.566064000 | 1.122844000  |
| C | 1.763278000  | 1.249800000  | 0.545984000  |
| O | 1.409039000  | 2.100569000  | 1.322839000  |
| O | 2.308800000  | 1.555172000  | -0.660556000 |
| C | 2.379649000  | 2.952281000  | -0.954528000 |
| H | 1.381112000  | 3.387660000  | -0.955604000 |

|   |             |             |              |
|---|-------------|-------------|--------------|
| H | 2.992319000 | 3.467471000 | -0.215212000 |
| H | 2.828135000 | 3.025783000 | -1.942030000 |

**TS-anti-FA //(S)-2-phenylpropanal //Nu = Me<sub>2</sub>S=CH-CO<sub>2</sub>Me**

**E** = -1168.842736

**H** = -1168.822246

**G** = -1168.891975

**N<sub>imag</sub>** = 1, -202.7803 cm<sup>-1</sup>

**SP** = -1167.552404

|   |              |              |              |
|---|--------------|--------------|--------------|
| C | 1.049755000  | 0.423708000  | -0.573768000 |
| C | 0.137991000  | -0.816134000 | -0.487803000 |
| H | 0.202972000  | -1.399041000 | -1.436980000 |
| C | 2.462072000  | 0.095516000  | -0.119537000 |
| C | 3.007792000  | -1.184927000 | -0.220220000 |
| C | 3.278561000  | 1.127661000  | 0.347006000  |
| C | 4.334131000  | -1.420465000 | 0.129195000  |
| H | 2.386132000  | -2.011711000 | -0.542459000 |
| C | 4.602926000  | 0.896384000  | 0.701678000  |
| H | 2.866323000  | 2.129609000  | 0.435067000  |
| C | 5.137762000  | -0.383057000 | 0.590226000  |
| H | 4.738093000  | -2.424151000 | 0.050411000  |
| H | 5.215401000  | 1.713616000  | 1.067460000  |
| H | 6.169243000  | -0.571188000 | 0.867131000  |
| O | 0.094321000  | -1.483686000 | 0.591427000  |
| C | 1.099014000  | 0.996888000  | -1.995285000 |
| H | 0.117591000  | 1.322299000  | -2.343044000 |
| H | 1.766920000  | 1.859157000  | -2.041766000 |
| H | 1.490261000  | 0.243579000  | -2.685847000 |
| H | 0.658879000  | 1.181407000  | 0.116595000  |
| C | -1.575140000 | -0.143776000 | -0.866291000 |
| H | -1.701770000 | -0.170108000 | -1.947163000 |
| S | -2.559015000 | -1.500425000 | -0.239289000 |
| C | -2.525751000 | -1.508748000 | 1.574699000  |
| H | -2.842037000 | -2.510427000 | 1.862626000  |
| H | -1.485863000 | -1.338524000 | 1.846685000  |
| H | -3.194662000 | -0.743292000 | 1.954617000  |
| C | -4.262382000 | -0.950287000 | -0.507567000 |
| H | -4.931348000 | -1.697760000 | -0.081165000 |
| H | -4.412200000 | 0.016029000  | -0.027706000 |
| H | -4.428631000 | -0.874626000 | -1.580343000 |
| C | -1.855176000 | 1.206081000  | -0.347959000 |
| O | -1.738636000 | 2.218062000  | -0.994017000 |
| O | -2.174801000 | 1.220367000  | 0.966151000  |
| C | -2.266691000 | 2.518488000  | 1.554736000  |
| H | -1.316448000 | 3.042775000  | 1.458108000  |
| H | -3.047640000 | 3.104853000  | 1.070761000  |
| H | -2.503234000 | 2.352346000  | 2.602495000  |

**TS-FA-hindered //(S)-2-phenylpropanal //Nu = Me<sub>2</sub>S=CH-CO<sub>2</sub>Me**

**E** = -1168.843203

**H** = -1168.823651

**G** = -1168.890300

**N<sub>imag</sub>** = 2, -250.2292 cm<sup>-1</sup>, -52.1735 cm<sup>-1</sup>

**SP** = -1167.553221

|   |              |              |              |
|---|--------------|--------------|--------------|
| C | 1.353798000  | 0.397954000  | 1.759301000  |
| C | -0.169707000 | -0.004574000 | 1.667840000  |
| H | -0.789645000 | 0.913531000  | 1.793131000  |
| C | 2.193347000  | 0.082650000  | 0.544175000  |
| C | 2.547198000  | 1.030130000  | -0.416627000 |
| C | 2.589468000  | -1.245746000 | 0.341758000  |

|   |              |              |              |
|---|--------------|--------------|--------------|
| C | 3.263608000  | 0.658069000  | -1.552265000 |
| H | 2.240810000  | 2.062117000  | -0.300340000 |
| C | 3.300996000  | -1.620870000 | -0.791782000 |
| H | 2.317801000  | -1.989208000 | 1.085846000  |
| C | 3.640879000  | -0.665862000 | -1.747744000 |
| H | 3.523981000  | 1.410316000  | -2.289084000 |
| H | 3.598420000  | -2.655590000 | -0.925676000 |
| H | 4.200537000  | -0.950773000 | -2.631878000 |
| O | -0.528094000 | -1.029287000 | 2.322951000  |
| C | 1.448235000  | 1.861013000  | 2.192474000  |
| H | 0.925723000  | 2.005686000  | 3.140813000  |
| H | 2.487226000  | 2.172023000  | 2.324288000  |
| H | 0.983502000  | 2.522726000  | 1.456788000  |
| H | 1.704706000  | -0.239324000 | 2.574253000  |
| C | -0.611138000 | -0.215205000 | -0.173362000 |
| H | 0.294457000  | -0.524010000 | -0.687167000 |
| S | -1.658488000 | -1.650132000 | -0.115676000 |
| C | -3.069677000 | -1.269318000 | 0.949208000  |
| H | -3.615348000 | -0.421498000 | 0.547637000  |
| H | -3.681340000 | -2.170804000 | 0.972598000  |
| H | -2.630925000 | -1.074503000 | 1.926806000  |
| C | -2.476912000 | -1.720264000 | -1.728316000 |
| H | -3.146848000 | -2.579918000 | -1.724828000 |
| H | -3.024192000 | -0.798136000 | -1.907533000 |
| H | -1.703019000 | -1.862704000 | -2.480420000 |
| C | -1.119665000 | 1.066839000  | -0.670910000 |
| O | -0.410371000 | 1.995461000  | -0.966750000 |
| O | -2.475313000 | 1.179005000  | -0.655911000 |
| C | -2.975529000 | 2.482042000  | -0.961193000 |
| H | -2.590439000 | 3.210944000  | -0.249006000 |
| H | -2.680963000 | 2.778107000  | -1.967567000 |
| H | -4.057814000 | 2.410536000  | -0.885497000 |
